# Supplementary material for: Severe myalgic encephalomyelitis/chronic fatigue syndrome in children and young people: a British Paediatric Surveillance Unit study
Source: PubMed Central journal article supplement — Arch Dis Child. 2022 Dec 1;108(3):230–5. doi: 10.1136/archdischild-2022-324319 (PMC9985735; doi:10.1136/archdischild-2022-324319), 2022-12-01
Supplement: archdischild-2022-324319supp001.pdf [file archdischild-2022-324319supp001.pdf]

BPSU Severe CFS/ME Data Collection Form v4.0 31/01/2018  
 IRAS Project ID: 223838

BPSU ID:

## British Paediatric Surveillance Unit Study Severe Chronic Fatigue Syndrome/Myalgic Encephalitis Data Collection Form CONFIDENTIAL

### Section A: Reporter Details

- 1.1** Date of completion of questionnaire:   /   /
- 1.2** Consultant responsible for case: \_\_\_\_\_
- 1.3** Hospital name: \_\_\_\_\_
- 1.4** Telephone number: \_\_\_\_\_ Email: \_\_\_\_\_
- 1.5** Has the patient been referred to/from another centre? Yes  No  Not known
- If yes: 1) please name centre: \_\_\_\_\_
- 2) please name consultant: \_\_\_\_\_

### Section B: Case Details

-  **2.1** NHS/CHI No:
- 2.2** Hospital No:
- 2.3** Sex: M  F  Date of birth:   /   /
-  **2.4** Ethnicity\*:   Specify if any "Other" background
- \*Please choose the correct ethnicity code from Appendix A overleaf*
- 2.5** Partial postcode (first three letters)

BPSU Severe CFS/ME Data Collection Form v4.0 31/01/2018  
 IRAS Project ID: 223838

BPSU ID:

## Appendix A

### Appendix A: Coding for Ethnic Group (ONS 2001 for UK / Ireland wide data collection)

|                                        | Ethnicity Code |                                                                     |
|----------------------------------------|----------------|---------------------------------------------------------------------|
| <b>A White</b>                         | <b>1</b>       | Any White background                                                |
| <b>B Mixed</b>                         | <b>2</b>       | White and Black Caribbean                                           |
|                                        | <b>3</b>       | White and Black African                                             |
|                                        | <b>4</b>       | White and Asian                                                     |
|                                        | <b>5</b>       | Any Other Mixed background, <i>please write in <b>section</b></i>   |
|                                        | <b>6</b>       | Indian                                                              |
| <b>C Asian or Asian British</b>        | <b>7</b>       | Pakistani                                                           |
|                                        | <b>8</b>       | Bangladeshi                                                         |
|                                        | <b>9</b>       | Any Other Asian background, <i>please write in <b>section</b></i>   |
|                                        | <b>10</b>      | Caribbean                                                           |
| <b>D Black or British Black</b>        | <b>11</b>      | African                                                             |
|                                        | <b>12</b>      | Any Other African background, <i>please write in <b>section</b></i> |
|                                        | <b>13</b>      | Chinese                                                             |
| <b>E Chinese or other ethnic group</b> | <b>14</b>      | Any Other, <i>please write in <b>section</b></i>                    |
|                                        | <b>15</b>      | Ethnicity not known                                                 |
| <b>F Unknown</b>                       |                |                                                                     |

BPSU Severe CFS/ME Data Collection Form v4.0 31/01/2018  
IRAS Project ID: 223838

## Section C: Presentation/Clinical features

### Give best possible estimate

**3.1** Date when fatigue (as reported by mother/child or first recorded by medical team)    /    /

**3.2** Date of diagnosis    /    /     
Date when became housebound    /    /

**3.3** Date of most recent medical assessment    /    /

**3.4 The fatigue:** *(Please tick)*

|                                                                                                                                                 | Yes                      | No                       | Don't know               |
|-------------------------------------------------------------------------------------------------------------------------------------------------|--------------------------|--------------------------|--------------------------|
| Is not lifelong (fatigue not noticeable from birth)                                                                                             | <input type="checkbox"/> | <input type="checkbox"/> | <input type="checkbox"/> |
| Lasted 3 months or longer                                                                                                                       | <input type="checkbox"/> | <input type="checkbox"/> | <input type="checkbox"/> |
| Not due to over exertion (for example sport)                                                                                                    | <input type="checkbox"/> | <input type="checkbox"/> | <input type="checkbox"/> |
| Not relieved by rest                                                                                                                            | <input type="checkbox"/> | <input type="checkbox"/> | <input type="checkbox"/> |
| Is not because of other medical conditions                                                                                                      | <input type="checkbox"/> | <input type="checkbox"/> | <input type="checkbox"/> |
| Means child unable to leave the house without severe and prolonged after effect.                                                                | <input type="checkbox"/> | <input type="checkbox"/> | <input type="checkbox"/> |
| Means child only leaves house occasionally (less than once a week)                                                                              | <input type="checkbox"/> | <input type="checkbox"/> | <input type="checkbox"/> |
| Causes significant reduction in ability to carry out activities of daily living (eating, drinking, preparing food, toileting, washing, walking) | <input type="checkbox"/> | <input type="checkbox"/> | <input type="checkbox"/> |

### 3.5 Does the child have the following symptoms?

|                                                   | Yes                      | No                       | Don't know               |
|---------------------------------------------------|--------------------------|--------------------------|--------------------------|
| Impaired memory or concentration                  | <input type="checkbox"/> | <input type="checkbox"/> | <input type="checkbox"/> |
| Post-exertion malaise*                            | <input type="checkbox"/> | <input type="checkbox"/> | <input type="checkbox"/> |
| Problems with sleep including un-refreshing sleep | <input type="checkbox"/> | <input type="checkbox"/> | <input type="checkbox"/> |
| Muscle pain                                       | <input type="checkbox"/> | <input type="checkbox"/> | <input type="checkbox"/> |
| Pain in multiple joints                           | <input type="checkbox"/> | <input type="checkbox"/> | <input type="checkbox"/> |
| Headaches of a new kind or greater severity       | <input type="checkbox"/> | <input type="checkbox"/> | <input type="checkbox"/> |
| Sore throat, frequent or recurring                | <input type="checkbox"/> | <input type="checkbox"/> | <input type="checkbox"/> |
| Tender lymph nodes (cervical or axillary)         | <input type="checkbox"/> | <input type="checkbox"/> | <input type="checkbox"/> |

\* physical or mental exertions bring on "extreme, prolonged exhaustion and sickness"

BPSU Severe CFS/ME Data Collection Form v4.0 31/01/2018  
IRAS Project ID: 223838

## Section D: Function

### Give best possible estimate

**4.1 What has the child's school attendance been over the last 6 weeks?** (Please tick best estimate)

No tuition (no home tuition or schooling)

Yes

Home tuition

Attending school or hospital school for less than one hour a week

Attending school for more than one hour a week

Don't know

**\*if it has been the school holidays please use equivalent activity**

**4.2 What is the child's current level of independence in activities of daily living?" (eating, drinking, preparing food, toileting, washing, walking)**

Requires help with all activities of daily living

Yes

Requires some help with daily activities sometimes

Able to do all daily activities over last 6 weeks

Please provide further information:

BPSU Severe CFS/ME Data Collection Form v4.0 31/01/2018  
IRAS Project ID: 223838

## Section D: Investigations and Management

### 5.1 Are the following test results in the normal range based on your local lab ranges?

|                                                    | Yes                      | No                       | Not done or don't know   |
|----------------------------------------------------|--------------------------|--------------------------|--------------------------|
| full blood count,                                  | <input type="checkbox"/> | <input type="checkbox"/> | <input type="checkbox"/> |
| urea and electrolytes                              | <input type="checkbox"/> | <input type="checkbox"/> | <input type="checkbox"/> |
| serum creatinine                                   | <input type="checkbox"/> | <input type="checkbox"/> | <input type="checkbox"/> |
| thyroid function                                   | <input type="checkbox"/> | <input type="checkbox"/> | <input type="checkbox"/> |
| erythrocyte sedimentation rate or plasma viscosity | <input type="checkbox"/> | <input type="checkbox"/> | <input type="checkbox"/> |
| C-reactive protein                                 | <input type="checkbox"/> | <input type="checkbox"/> | <input type="checkbox"/> |
| random blood glucose                               | <input type="checkbox"/> | <input type="checkbox"/> | <input type="checkbox"/> |
| screening blood tests for gluten sensitivity       | <input type="checkbox"/> | <input type="checkbox"/> | <input type="checkbox"/> |
| serum calcium                                      | <input type="checkbox"/> | <input type="checkbox"/> | <input type="checkbox"/> |
| creatine kinase                                    | <input type="checkbox"/> | <input type="checkbox"/> | <input type="checkbox"/> |
| serum ferritin                                     | <input type="checkbox"/> | <input type="checkbox"/> | <input type="checkbox"/> |
| liver function                                     | <input type="checkbox"/> | <input type="checkbox"/> | <input type="checkbox"/> |
| Urinalysis                                         | <input type="checkbox"/> | <input type="checkbox"/> | <input type="checkbox"/> |

### 5.2 Has the child received any of the following? (please tick all that apply)

|                                     | Yes                      | No                       | Don't Know               |
|-------------------------------------|--------------------------|--------------------------|--------------------------|
| Cognitive Behaviour Therapy         | <input type="checkbox"/> | <input type="checkbox"/> | <input type="checkbox"/> |
| Graded Exercise Therapy             | <input type="checkbox"/> | <input type="checkbox"/> | <input type="checkbox"/> |
| Activity Management                 | <input type="checkbox"/> | <input type="checkbox"/> | <input type="checkbox"/> |
| Medication for symptoms             | <input type="checkbox"/> | <input type="checkbox"/> | <input type="checkbox"/> |
| Domiciliary assessment or treatment | <input type="checkbox"/> | <input type="checkbox"/> | <input type="checkbox"/> |
| Treatment from CAMHS?               | <input type="checkbox"/> | <input type="checkbox"/> | <input type="checkbox"/> |
| Physiotherapy?                      | <input type="checkbox"/> | <input type="checkbox"/> | <input type="checkbox"/> |
| Social services assessment/support? | <input type="checkbox"/> | <input type="checkbox"/> | <input type="checkbox"/> |

BPSU Severe CFS/ME Data Collection Form v4.0 31/01/2018  
IRAS Project ID: 223838

**Thank you for taking the time to complete the Questionnaire** 

Please print and return the completed form in the SAE to:

---

---

---

If you have any questions about the study please do not hesitate to contact the investigators by email or telephone:

Telephone: \_\_\_\_\_ Email: \_\_\_\_\_
